# Supplementary material for: 1IL and 3MLCT excited states modulated by H+: the structure and photophysical properties of [(2-bromo-5-(1H-pyrazol-1-yl)pyrazine)Re(CO)3Br]
Source: Royal Society of Chemistry journal article supplement (doi:10.1039/c8nj04196b), 2019-01-01
Supplement: c8nj04196b1.pdf [file c8nj04196b1.pdf]

**Electronic Supplementary Information**

**<sup>1</sup>IL and <sup>3</sup>MLCT Excited States Modulated by H<sup>+</sup>: Structure and Photophysical Properties of [(2-bromo-5-(1H-pyrazol-1-yl)pyrazine)Re(CO)<sub>3</sub>Br]**

by the authors:

Nancy Pizarro, Marianela Saldías, Nicolás Guzmán, Catalina Sandoval-Altamirano, Samia Kahlal, Jean-Yves Saillard, Jean-Rene Hamon and Andrés Vega

**Table S1.** Crystal data and structure refinement details for **I**.

|                                                                                                         | <b>298 K</b>                           | <b>100 K</b>                           |
|---------------------------------------------------------------------------------------------------------|----------------------------------------|----------------------------------------|
| FW/ <i>uma</i>                                                                                          | 575.20                                 | 575.20                                 |
| Crystal System                                                                                          | Triclinic                              | Triclinic                              |
| Space Group                                                                                             | $P\bar{1}$                             | $P\bar{1}$                             |
| <i>a</i> (Å)                                                                                            | 6.769(4)                               | 6.6120(19)                             |
| <i>b</i> (Å)                                                                                            | 8.079(4)                               | 7.947(2)                               |
| <i>c</i> (Å)                                                                                            | 13.343(7)                              | 13.079(4)                              |
| $\alpha$ (°)                                                                                            | 106.008(7)                             | 105.928(3)                             |
| $\beta$ (°)                                                                                             | 102.690(6)                             | 102.163(3)                             |
| $\gamma$ (°)                                                                                            | 91.343(7)                              | 92.124(3)                              |
| <i>V</i> (Å <sup>3</sup> )                                                                              | 681.6(6)                               | 642.7(3)                               |
| <i>Z</i> ( <i>Z'</i> )                                                                                  | 2(2)                                   | 2(2)                                   |
| $\delta$ (g cm <sup>-3</sup> )                                                                          | 2.803                                  | 2.972                                  |
| $\mu$ (mm <sup>-1</sup> )                                                                               | 14.79                                  | 14.79                                  |
| <i>F</i> (000)                                                                                          | 524                                    | 524                                    |
| $\theta$ range                                                                                          | 1.6–26.0                               | 1.6–26.0                               |
| <i>hkl</i> range                                                                                        | -8 ≤ <i>h</i> ≤ 8<br>-9 ≤ <i>l</i> ≤ 9 | -8 ≤ <i>h</i> ≤ 8<br>-9 ≤ <i>l</i> ≤ 9 |
|                                                                                                         | -16 ≤ <i>k</i> ≤ 16                    | -16 ≤ <i>k</i> ≤ 16                    |
| <i>N</i> <sub>tot</sub> , <i>N</i> <sub>uniq</sub> ( <i>R</i> <sub>int</sub> ), <i>N</i> <sub>obs</sub> | 5316, 2664 (0.066), 2181               | 5034, 2520 (0.032), 2393               |
| Ref. Parameters                                                                                         | 181                                    | 182                                    |
| GOF                                                                                                     | 1.06                                   | 1.06                                   |
| <i>R</i> <sub>1</sub> , <i>wR</i> <sub>2</sub> (obs)                                                    | 0.052, 0.123                           | 0.022, 0.050                           |
| Max. and min $\Delta\rho$ e Å <sup>-3</sup>                                                             | 3.55, -1.96                            | 1.83, -0.82                            |

**Table S2.** Selected bond distances (Å) for **I** as determined by X-rays diffraction compared to those computed from optimized models (DFT, Gas Phase).

|         | <b>I (DRX 298 K)</b> | <b>I (DRX 100 K)</b> | <b>I (DFT)</b> | <b>IH<sup>+</sup> (DFT)</b> |
|---------|----------------------|----------------------|----------------|-----------------------------|
| Re1—C14 | 1.895(15)            | 1.908(4)             | 1.929          | 1.940                       |
| Re1—C13 | 1.918(14)            | 1.912(5)             | 1.932          | 1.986                       |
| Re1—C15 | 1.959(12)            | 1.926(5)             | 1.922          | 1.955                       |
| Re1—N1  | 2.169(9)             | 2.140(4)             | 2.217          | 2.180                       |
| Re1—N3  | 2.199(10)            | 2.167(3)             | 2.193          | 2.099                       |
| Re1—Br1 | 2.6144(16)           | 2.5988(9)            | 2.657          | 2.618                       |

**Table S3.** Summary of main energy, wavelength and oscillator strength computed for observed transitions in the absorption spectra of **I**, together with the orbitals implied.

| <b>N</b> | <b>E / eV</b> | <b><math>\lambda</math> / nm</b> | <b><i>f</i></b> | <b>Major Contributions</b>                                             |
|----------|---------------|----------------------------------|-----------------|------------------------------------------------------------------------|
|          |               |                                  |                 | <b>I</b>                                                               |
| 2        | 2.16          | 574                              | 0.023           | HOMO-1 → LUMO (97 %)                                                   |
| 8        | 3.30          | 376                              | 0.078           | HOMO-4 → LUMO (80 %)<br>HOMO-3 → LUMO+1 (12 %)                         |
| 9        | 3.43          | 361                              | 0.049           | HOMO-4 → LUMO (12 %)<br>HOMO-3 → LUMO+1 (85 %)                         |
| 10       | 3.52          | 352                              | 0.011           | HOMO-4 → LUMO+1 (96 %)                                                 |
| 12       | 3.98          | 312                              | 0.013           | HOMO-5 → LUMO+1 (11 %)<br>HOMO → LUMO+2 (68 %)<br>HOMO → LUMO+5 (10 %) |
| 15       | 4.14          | 300                              | 0.012           | HOMO-1 → LUMO+4 (20 %)<br>HOMO → LUMO+4 (52 %)                         |
| 18       | 4.25          | 292                              | 0.010           | HOMO → LUMO+2 (14 %)<br>HOMO → LUMO+3 (17 %)<br>HOMO → LUMO+5 (56 %)   |
| 20       | 4.48          | 276                              | 0.023           | HOMO-1 → LUMO+3 (40 %)<br>HOMO-1 → LUMO+5 (38 %)                       |
| 21       | 4.56          | 272                              | 0.033           | HOMO-6 → LUMO (81 %)                                                   |
| 22       | 4.58          | 271                              | 0.011           | HOMO-1 → LUMO+3 (46 %)<br>HOMO-1 → LUMO+5 (34 %)                       |
| 26       | 4.93          | 251                              | 0.194           | HOMO-6 → LUMO+1 (71 %)                                                 |
| 28       | 5.04          | 246                              | 0.014           | HOMO-3 → LUMO+2 (32 %)<br>HOMO → LUMO+7 (32 %)                         |
| 30       | 5.09          | 244                              | 0.016           | HOMO-3 → LUMO+2 (16 %)<br>HOMO → LUMO+6 (24 %)<br>HOMO → LUMO+7 (17 %) |

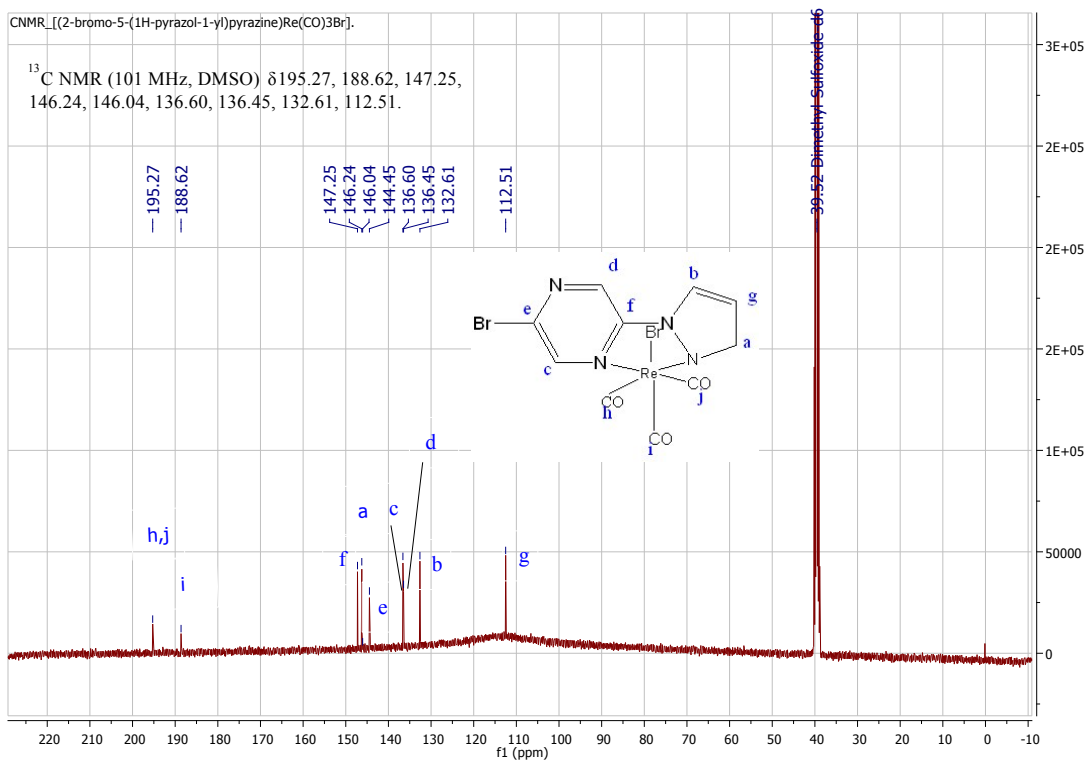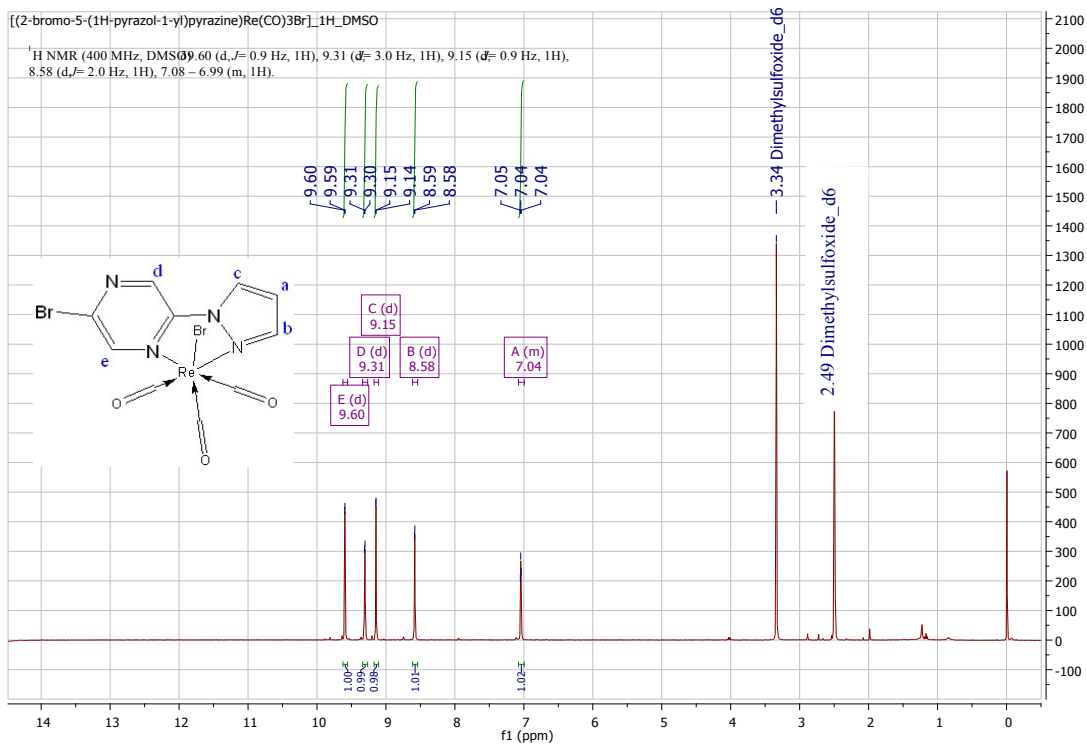

Figure S1. <sup>13</sup>CNMR and <sup>1</sup>HNMR spectra determined for [(L<sub>1</sub>)Re(CO)<sub>3</sub>Br].

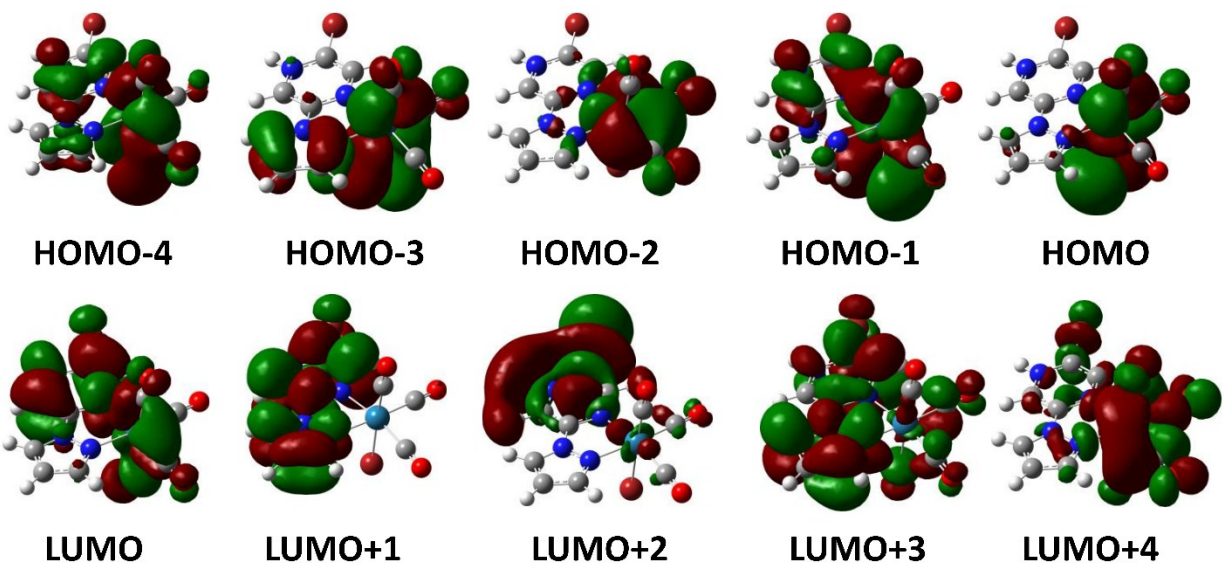

Figure S2. Frontier and near frontier Kohn-Sham orbitals computed for  $\text{IH}^+$ .

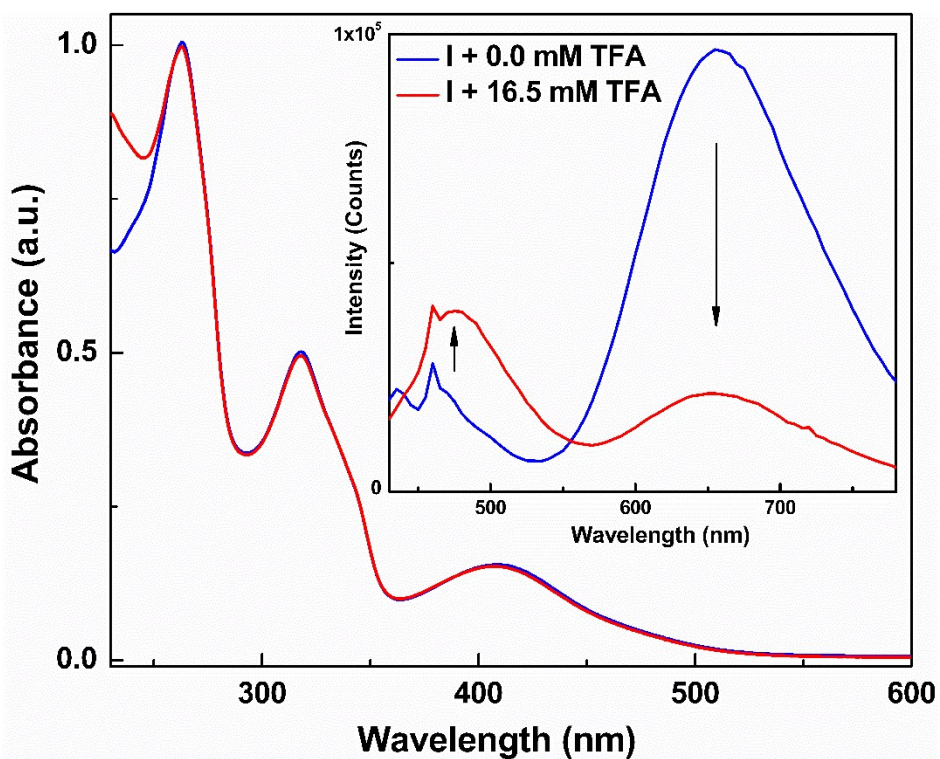

Figure S3. Absorption spectrum of  $[(\text{L}_1)\text{Re}(\text{CO})_3\text{Br}]$  in DCM solution in absence of TFA (blue line) and in presence of 16.5 mM TFA (red line). Inset: Emission spectrum of  $[(\text{L}_1)\text{Re}(\text{CO})_3\text{Br}]$  in DCM solution in absence and presence of TFA ( $\lambda_{\text{exc}} = 405 \text{ nm}$ ).

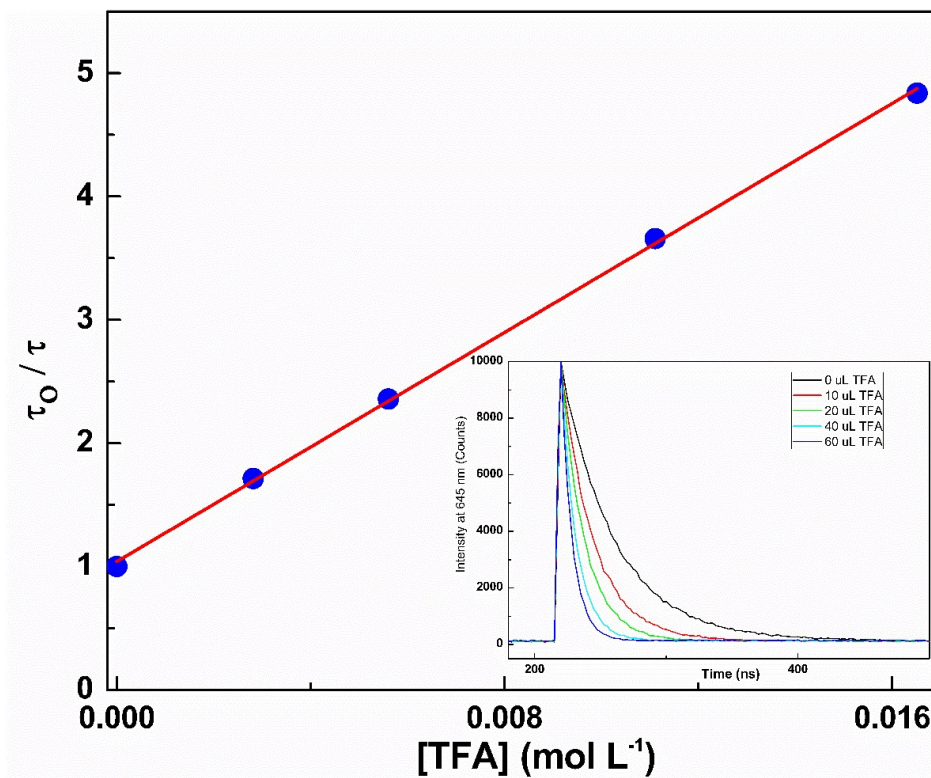

**Figure S4.** Stern-Volmer plot for the dynamic quenching of the MLCT excited state of  $[(L_1)Re(CO)_3Br]$  upon addition of trifluoroacetic acid in DCM solution. ( $\lambda_{exc} = 405$  nm,  $\lambda_{em} = 645$  nm).
